# Supplementary material for: Synthesis of a novel hedgehog-shaped Bi2S3 nanostructure for a sensitive electrochemical glucose biosensor
Source: Royal Society of Chemistry journal article supplement (doi:10.1039/d1nj03392a), 2021-01-01
Supplement: d1nj03392a1.pdf [file d1nj03392a1.pdf]

Electronic Supplementary Information (ESI) for New Journal of Chemistry

This journal is (c) The Royal Society of Chemistry 2021

## Synthesis of novel hedgehog-shaped Bi<sub>2</sub>S<sub>3</sub> nanostructure for sensitive electrochemical glucose biosensor

Feng Shi,<sup>a+</sup> Yadong Xue,<sup>b+</sup> Letian Hong,<sup>a+</sup> Jiawen Cao,<sup>a</sup> Juan Li,<sup>a</sup> Min Jiang,<sup>c\*</sup> Xiaoya Hu,<sup>a</sup> Zhanjun Yang,<sup>a\*</sup> Ming Shen<sup>a\*</sup>

<sup>a</sup>College of Chemistry and Chemical Engineering, Yangzhou University Yangzhou 225002, PR China

<sup>b</sup>Central Laboratory, Affiliated Jinhua Hospital, Zhejiang University School of Medicine, Jinhua 321000, China

<sup>c</sup>Department of Outpatient, Wujin Hospital Affiliated with Jiangsu University and Wujin Clinical College of Xuzhou Medical University, Changzhou City, Jiangsu Province, China

## Experimental

**Materials and Reagents:** The GOx molecules (EC 1.1.3.4, 108 U mg<sup>-1</sup>, from *Aspergillus niger*) were bought from Amresco. Glucose and Nafion were supplied by Sigma-Aldrich. Bismuth nitrate (Bi(NO<sub>3</sub>)<sub>3</sub>), cetyltrimethyl ammonium bromide (CTAB), trimellitic acid (C<sub>9</sub>H<sub>6</sub>O<sub>6</sub>), thiourea (CH<sub>4</sub>N<sub>2</sub>S), anhydrous ethanol, sodium phosphate (Na<sub>2</sub>HPO<sub>4</sub>), sodium dihydrogen phosphate (NaH<sub>2</sub>PO<sub>4</sub>), potassium chloride (KCl), potassium ferricyanide (K<sub>3</sub>Fe(CN)<sub>6</sub>), and potassium ferrocyanide (K<sub>4</sub>[Fe(CN)<sub>6</sub>]·3H<sub>2</sub>O) were purchased from Sinopharm Chemical Reagent Co., Ltd. Phosphate buffer solution (PBS, 0.1 mol·L<sup>-1</sup>) was the mixture of Na<sub>2</sub>HPO<sub>4</sub> and NaH<sub>2</sub>PO<sub>4</sub> solutions, and its pH was adjusted by H<sub>3</sub>PO<sub>4</sub> or NaOH solution. All reagents used in experiments were of analytical grade.

**Apparatus:** A CHI 852C electrochemical workstation was from Shanghai Chenhua Instrument Co. Ltd. (China), which was used to carry out electrochemical measurements. A three-electrode system, including a working electrode of glassy carbon electrode (GCE), a reference electrode of saturated calomel

electrode (SCE), and an auxiliary electrode of platinum wire were employed in the experiment. The cyclic voltametric tests were implemented at a scan rate of  $100 \text{ mV}\cdot\text{s}^{-1}$  in a cell with 10.0 mL PBS. All solution pH measurements were conducted on a S-25 digital pH-meter with glass combination electrode. A Hitachi S-4800 scanning electron microscope (Japan) was used to obtain scanning electron micrographs (SEM) at 15 kV of acceleration voltage. X-ray diffractometer spectra were measured by using polycrystalline X-ray diffractometer (XRD, D8 advance, Bruker AXS, Germany). Electrochemical impedance spectroscopy (EIS) was tested in a  $\text{KNO}_3$  solution ( $0.1 \text{ mol}\cdot\text{L}^{-1}$ ) including 5 mM of  $\text{K}_3[\text{Fe}(\text{CN})_6]/\text{K}_4[\text{Fe}(\text{CN})_6]$  within a frequency range from 0.01 to 10 KHz. Fourier transform infrared (FT-IR) spectrum was recorded at a Tensor 27 spectrometer (Bruker Co., Germany).

#### **Synthesis of hedgehog-shaped $\text{Bi}_2\text{S}_3$ nanostructure and electrochemical glucose biosensor:**

Hedgehog-shaped  $\text{Bi}_2\text{S}_3$  nanostructures were prepared by a composite soft template method by a simple hydrothermal route according to previous research<sup>s1</sup>. Firstly, 0.0210 g of trimellitic acid, 0.0365 g of CTAB, 0.3806 g of thiourea, 0.50 mL of bismuth nitrate solution ( $0.20 \text{ mol}\cdot\text{L}^{-1}$ ) and 9.50 mL of distilled water were transferred into a 50 mL beaker. The system was ultrasonically mixed to obtain a homogeneous light yellow solution. The obtained solution was added to a Teflon-lined reaction kettle, which was placed in a constant-temperature oven for 12 h at  $120 \text{ }^\circ\text{C}$ . After that, the obtained black precipitates were centrifuged and washed using ethanol and distilled water several times in sequence, and finally dried at  $60 \text{ }^\circ\text{C}$  under vacuum for 12 h to obtain black powder product.

The surface of GCEs were polished with  $0.3\text{-}\mu\text{m}$  and  $0.05\text{-}\mu\text{m}$  alumina slurry (Buhler) in turn, and cleaned carefully using distilled water. High purity  $\text{N}_2$  stream was used to dry GCEs at room temperature. Then, 1.0 mg of HS- $\text{Bi}_2\text{S}_3$  was weighted to distilled water (1.0 mL) and dispersed by ultrasonication. Next, GOx (1.0 mg) was added into 100  $\mu\text{L}$  of HS- $\text{Bi}_2\text{S}_3$  suspension above, and kept shaking for at least 15 min. Next, 5.0  $\mu\text{L}$  of the mixed solution was coated on clean electrodes and dried naturally at room temperature. To avoid the leakage of the GOx from modified GCE, 5.0  $\mu\text{L}$  of Nafion (0.5%) was coated on surface of GOx/HS- $\text{Bi}_2\text{S}_3$ /GCE. The prepared Nafion/GOx/HS- $\text{Bi}_2\text{S}_3$ /GCE was stored in a refrigerator at  $4 \text{ }^\circ\text{C}$ .



## Optimization of electrochemical detection conditions

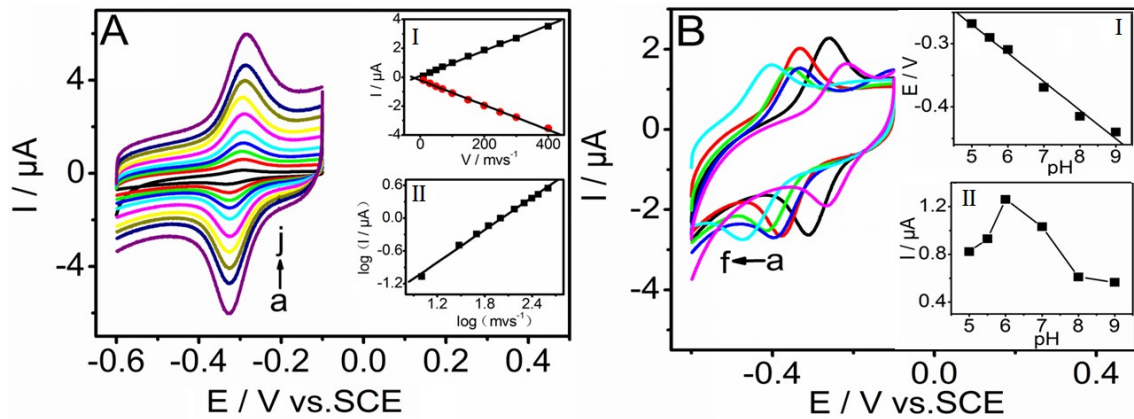

**Fig. S1.** (A) cyclic voltammograms of the Nafion/GOx/HS-Bi<sub>2</sub>S<sub>3</sub>/GCE in 0.1 M pH 6.0 N<sub>2</sub>-saturated PBS at 10, 20, 50, 80, 100, 150, 200 and 300 mV s<sup>-1</sup> (from a to j), inset I: plots of anodic and cathodic peak currents vs. scan rate, inset II: plot of logarithm of  $i_{pc}$  vs. logarithm of  $v$ ; and (B) Cyclic voltammograms of the Nafion/GOx/HS-Bi<sub>2</sub>S<sub>3</sub>/GCE in N<sub>2</sub>-saturated 0.1 M PBS with different pH values of (a-f) 5.0, 5.5, 6.0, 7.0, 8.0 and 9.0 at a scan rate of 100 mV s<sup>-1</sup>, inset I: plot of formal potential vs. pH, and inset II: plot of peak current vs. pH.

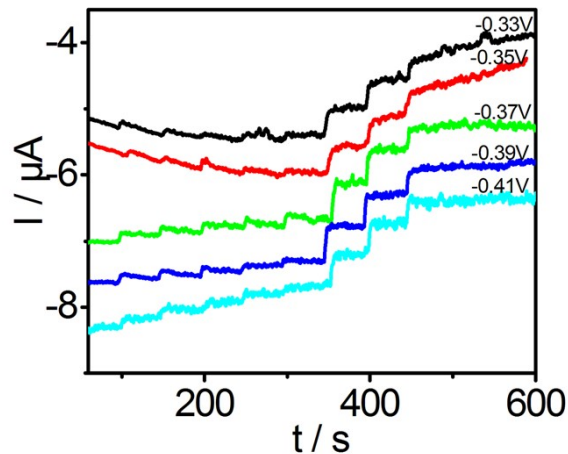

**Fig. S2.** Amperometric response of Nafion/GOx/Bi<sub>2</sub>S<sub>3</sub>/GCE at different potential to successive additions of glucose in a stirred 0.1 M pH 6.0 PBS.

**Table S1** Detection results of glucose in human serum samples

| Sample | Reference method (mM) | Proposed method (mM) | Relative errors (%) |
|--------|-----------------------|----------------------|---------------------|
| 1      | 4.64                  | 4.43                 | - 4.5               |
| 2      | 4.88                  | 5.03                 | 3.1                 |
| 3      | 5.19                  | 4.80                 | - 7.5               |
| 4      | 6.39                  | 5.92                 | - 7.4               |
| 5      | 10.55                 | 10.84                | 2.7                 |

**Reference**

S1. M. L. Ye, F. Shi, M. Shen, W. F. Qin, C. L. Ren, Z. J. Yang, *Colloid. Surface. A* 2021, **613**, 126094.
